# Supplementary material for: Association between Malnutrition Risk Factors and Physical Function in Community-Dwelling Adults ≥80 Years
Source: MDPI journal article supplement (doi:10.3390/jal3010003), 2023-01-06
Supplement: s1 [file s1]

**Supplementary Table S1: Collection of self-reported data**

| Variable                       | WIPP      |                   | ISS       |                   | Time perspective |
|--------------------------------|-----------|-------------------|-----------|-------------------|------------------|
|                                | Interview | Self-administered | Interview | Self-administered |                  |
| Poor appetite                  | X         |                   | X         |                   | Current          |
| Dysphagia                      | X         |                   |           | X                 | Current          |
| Poor dental state              | X         |                   |           | X                 | Current          |
| Age                            | X         |                   |           | X                 | -                |
| Sex                            | X         |                   |           | X                 | -                |
| Unintentional weight loss      | X         |                   | X         |                   | Preceding month  |
| Chronic conditions             | X         |                   |           | X                 | -                |
| Recent illness                 | X         |                   | X         |                   | Preceding month  |
| Polypharmacy                   | X         |                   | X         |                   | Current          |
| Health-related quality of life | X         |                   |           | X                 | Current          |
| Falls                          | X         |                   | X         |                   | Preceding year   |
